# Supplementary material for: NIR II-responsive core–shell La2O2S:Er3+@La2O2S nanoparticles towards 1.5 μm photodetection
Source: Royal Society of Chemistry journal article supplement (doi:10.1039/d4tc01409j), 2024-01-01
Supplement: d4tc01409j1.pdf [file d4tc01409j1.pdf]

## Supporting Information

# NIR II responsive core-shell $\text{La}_2\text{O}_2\text{S}:\text{Er}^{3+}@\text{La}_2\text{O}_2\text{S}$ nanoparticles towards 1.5 $\mu\text{m}$ photodetection

Xinyao Dong<sup>1,2</sup>, Na Zhou<sup>2</sup>, Minfeng Tian<sup>1</sup>, Yanan Ji<sup>2\*</sup>, Jingxuan Wang<sup>2</sup>, Jianing Fan<sup>2</sup>, Heyang Li<sup>3</sup>, Wen Xu<sup>2</sup>, Ping Duan<sup>1\*</sup>,  
Xiumei Yin<sup>2\*</sup>

1 School of Science, Dalian Maritime University, Dalian, Liaoning, 116026, PR China.

2 School of Physics and Materials Engineering, Dalian Minzu University, 18 Liaohe West Road, Dalian, 116600, PR China.

3 University College London, Gower Street, London WC1E 6BT, UK.

\* Corresponding authors: [jiyn@dlmu.edu.cn](mailto:jiyn@dlmu.edu.cn) (Yanan Ji); [duanping@dlmu.edu.cn](mailto:duanping@dlmu.edu.cn) (Ping Duan); [yinxiumei@dlmu.edu.cn](mailto:yinxiumei@dlmu.edu.cn) (Xiumei Yin).

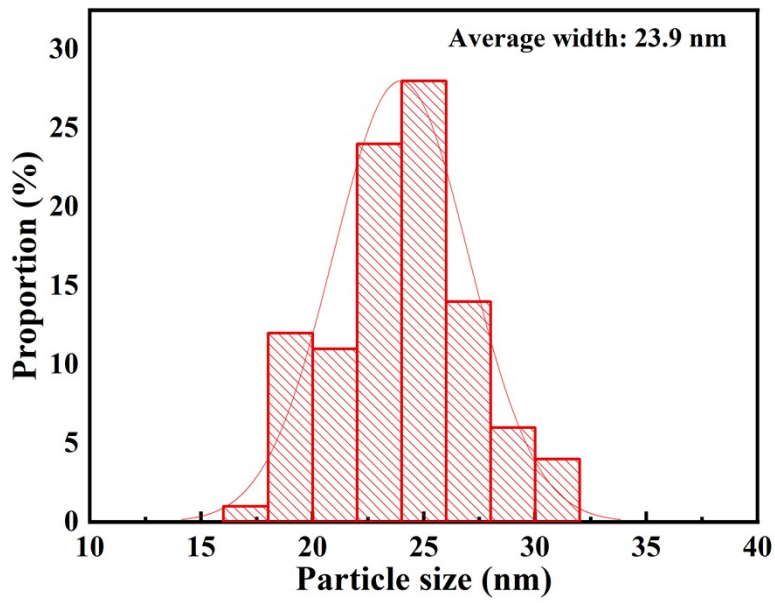

Fig. S1 The particle size distribution statistics results of core nanoparticles.

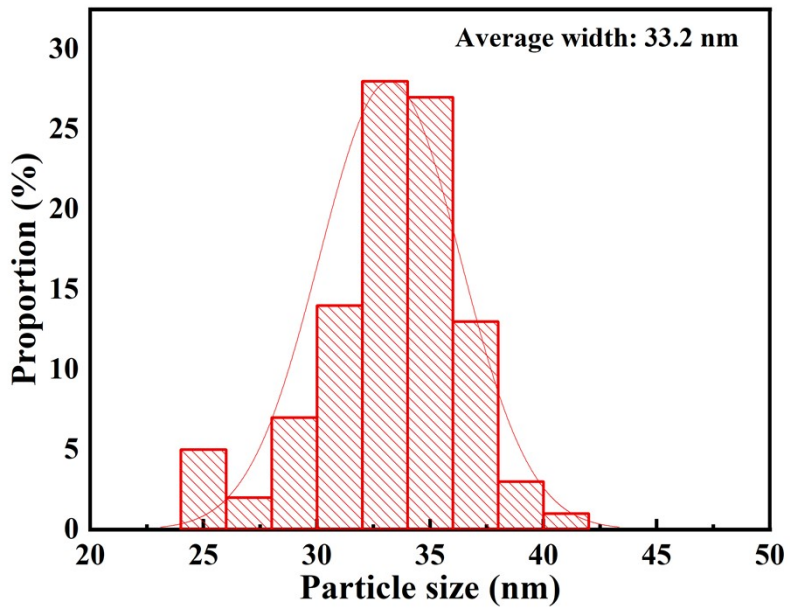

Fig. S2 The particle size distribution statistics results of core-shell nanoparticles.

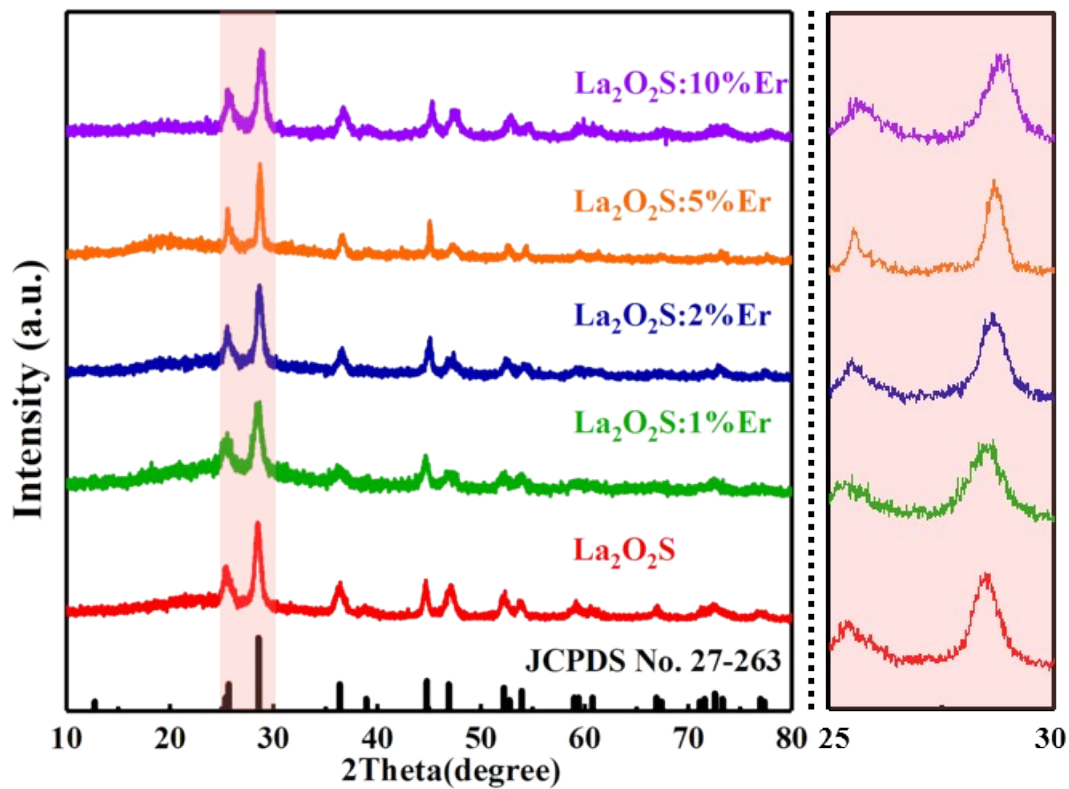

Fig. S3 XRD patterns of the  $\text{La}_2\text{O}_2\text{S}:\text{xEr}^{3+}$  ( $x = 0, 1, 2, 5, 10$  mol%) nanoparticles.

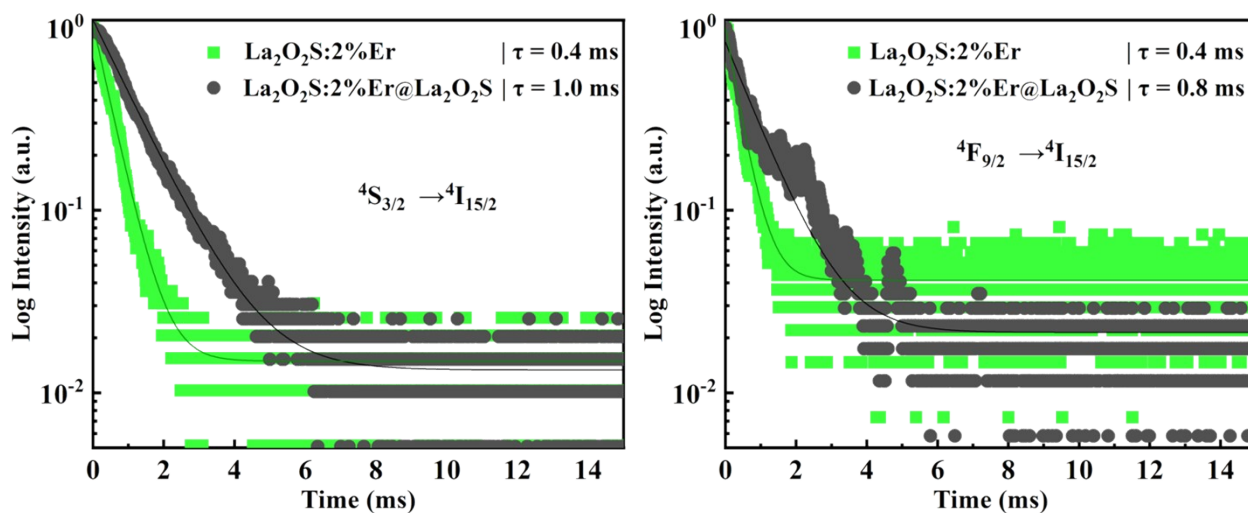

Fig. S4 Decay profiles of  $^4\text{S}_{3/2}$  and  $^4\text{F}_{9/2}$  levels of  $\text{La}_2\text{O}_2\text{S}:\text{2\%Er}^{3+}$  and  $\text{La}_2\text{O}_2\text{S}:\text{2\%Er}^{3+}@\text{La}_2\text{O}_2\text{S}$  under 1550 nm excitation.

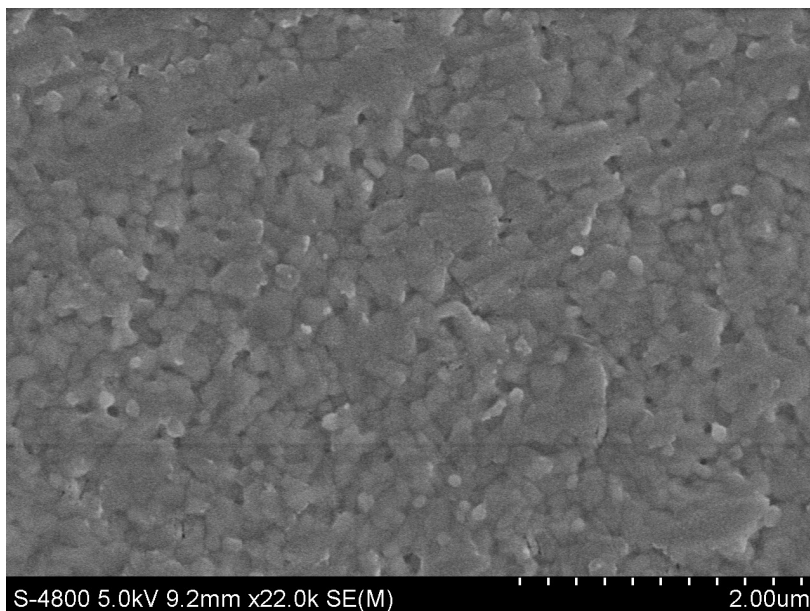

Fig. S5 Top view SEM image of MAPbI<sub>3</sub>/La<sub>2</sub>O<sub>2</sub>S:2%Er<sup>3+</sup>@La<sub>2</sub>O<sub>2</sub>S composite film.

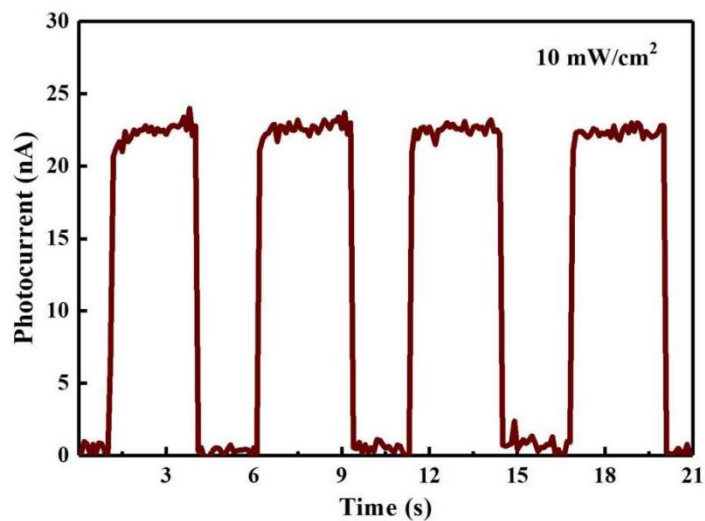

Fig. S6 Photocurrent-time response curve under 1550 nm excitation at power density of 10mW/cm<sup>2</sup>

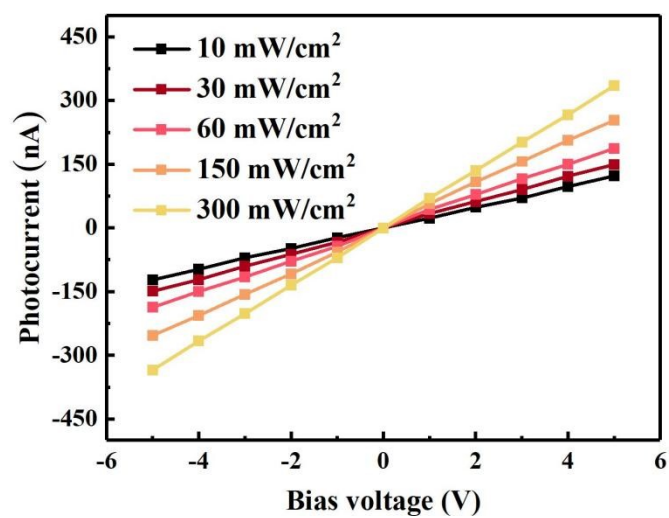

Fig. S7 Photocurrent of MAPbI<sub>3</sub>/La<sub>2</sub>O<sub>2</sub>S:2%Er<sup>3+</sup>@La<sub>2</sub>O<sub>2</sub>S PDs power density increased from 10 mW/cm<sup>2</sup> to 300 mW/cm<sup>2</sup>

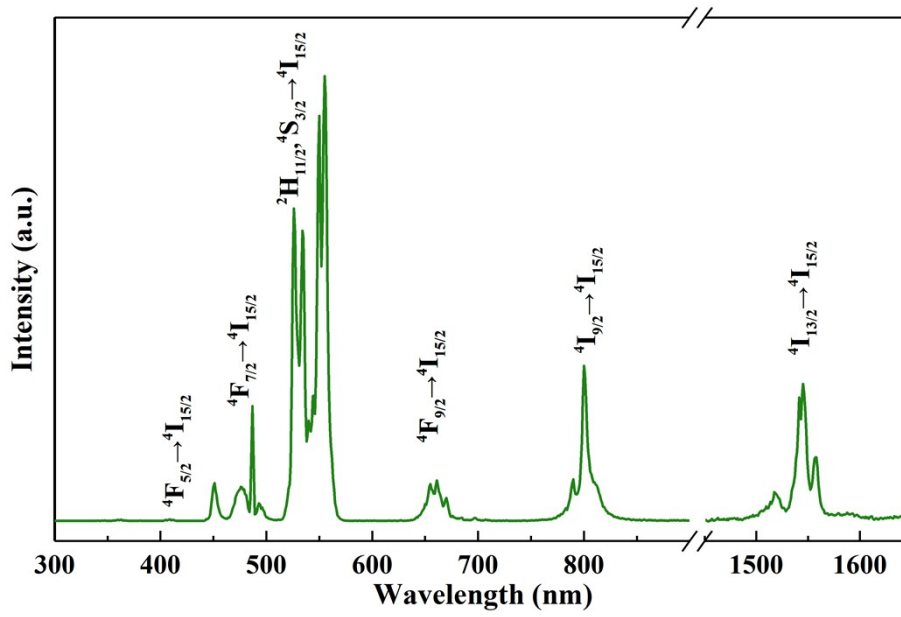

**Fig. S8** UC luminescence spectrum of  $\text{La}_2\text{O}_2\text{S}:2\%\text{Er}^{3+}@\text{La}_2\text{O}_2\text{S}$  under 980 nm excitation

**Tab. S1** Comparison with other photodetectors

| Samples                                                                                                                                                                                  | $\lambda$ (nm) | $T_r$ (s) | $T_d$ (s) | Ref.      |
|------------------------------------------------------------------------------------------------------------------------------------------------------------------------------------------|----------------|-----------|-----------|-----------|
| MAPbI <sub>3</sub> film                                                                                                                                                                  | 365            | <0.2      | <0.2      | [35]      |
|                                                                                                                                                                                          | 780            | <0.1      | <0.1      |           |
| NaYS <sub>2</sub> :Er <sup>3+</sup> /MAPbI <sub>3</sub>                                                                                                                                  | 1550           | 0.48      | 0.31      | [21]      |
| MAPbI <sub>3</sub> /Cs <sub>x</sub> WO <sub>3</sub> /NaYF <sub>4</sub> /<br>NaYF <sub>4</sub> :Yb <sup>3+</sup> ,Er <sup>3+</sup> @NaYF <sub>4</sub> :Yb <sup>3+</sup> ,Tm <sup>3+</sup> | 980            | 0.18      | 0.19      | [15]      |
| MAPbI <sub>3</sub> /La <sub>2</sub> O <sub>2</sub> S:2%Er <sup>3+</sup> @La <sub>2</sub> O <sub>2</sub> S                                                                                | 1550           | 0.22      | 0.21      | this work |
